# Supplementary material for: Bioprinted 3D Outer Retina Barrier Uncovers RPE-dependent Choroidal Phenotype in Advanced Macular Degeneration
Source: Research Square preprint supplement (doi:10.21203/rs.3.rs-135775/v1), 2021-01-13
Supplement: Supplementary file 2 [file c76b7859938f56a088c91786.pdf]

**Supplementary Table 1.** Media treatment schedule for maintenance of 3D-oBRB.

| Day(s)      | Basal Conditions       | Apical Conditions                |
|-------------|------------------------|----------------------------------|
| 1           | <b>Printing Medium</b> | <b>Printing Medium</b>           |
| 2-7         | <b>VDM</b>             | <b>VDM</b>                       |
| 8-14        | <b>VGM+AP</b>          | <b>RPE-MM + AP</b>               |
| 15-21       | <b>VGM</b>             | <b>RPE-MM</b>                    |
| 22-29       | <b>VGM</b>             | <b>RPE-MM + Prostaglandin E2</b> |
| 29-Fixation | <b>VMM</b>             | <b>RPE-MM + Prostaglandin E2</b> |

**Supplementary Table 2.** Libraries generated for single cell RNA-seq.

| Library ID | Library Concentration (ng/ul) | Library Average Size (bp) | Sequence Modality(e.g. PE50-6-50) | Tube Label | Sample ID* | Sample Barcode Index1: I7 Sequence |
|------------|-------------------------------|---------------------------|-----------------------------------|------------|------------|------------------------------------|
| IS0011     | 2nM                           | 455                       | (PE) 26-8-98mer                   | 2D iEndo   | CT_3878_S1 | SI-GA-A6                           |
| IS0011     | 2nM                           | 479                       | (PE) 26-8-98mer                   | 2D iRPE    | CT_3878_S2 | SI-GA-B6                           |
| IS0011     | 2nM                           | 454                       | (PE) 26-8-98mer                   | 3D iEndo   | CT_3878_S3 | SI-GA-C6                           |
| IS016      | 2nM                           | 508                       | (PE) 26-8-98mer                   | 3D iRPE    |            | SI-GA-F7                           |

**Supplementary Table 3.** Significant genes relevant to vascular maturation. p\*\*\*\*<0.0001. Data depicts

results from n = 5369 cells (2D iECs), and n = 1294 cells (3D-oBRB iECs).

| Partially-Mature (PM) |               |
|-----------------------|---------------|
| Gene                  | Average LogFC |
| TTR****               | 3.293097084   |
| PTGDS****             | 2.91023027    |
| SERPINF1****          | 2.746884668   |
| PMEL****              | 2.728151531   |
| TYRP1****             | 2.473397492   |
| SLC2A1****            | 2.447382476   |
| RBP1****              | 2.277384475   |
| DCT****               | 2.266739064   |
| APOE****              | 2.191424756   |
| ELN****               | 2.184219482   |
| CDKN1C****            | 2.184180543   |
| GPNMB****             | 2.155826338   |
| FRZB****              | 2.036587593   |
| TIMP3****             | 2.020232723   |
| NPC2****              | 1.971437309   |
| NEAT1****             | 1.877960021   |
| TRPM3****             | 1.868956372   |
| RPS4Y1****            | 1.748429142   |
| SFRP1****             | 1.71339181    |
| MIF****               | 1.626987544   |
| FOS****               | 1.61485332    |
| VEGFA****             | 1.604315395   |
| CRYAB****             | 1.596007132   |
| NDUFA4L2****          | 1.584758503   |
| EGR1****              | 1.583968974   |
| CST3****              | 1.583860234   |
| SCD****               | 1.576730172   |
| KCNQ1OT1****          | 1.569869951   |
| AKAP12****            | -1.509372337  |
| TUBB4B****            | -1.516117864  |
| LGALS1****            | -1.524191678  |
| TUBB6****             | -1.535855664  |
| SMS****               | -1.564620788  |
| GNG11****             | -1.573524516  |
| JPT1****              | -1.578619298  |
| ECSCR****             | -1.610296939  |
| TPM1****              | -1.705061753  |
| CAV1****              | -1.720755414  |
| CLIC1****             | -1.806758255  |
| MT1E****              | -1.829130034  |
| ARHGDIB****           | -1.833353979  |
| S100A16****           | -1.854543401  |
| SRGN****              | -1.855853186  |
| SERPINE1****          | -2.011057296  |
| TUBA1B****            | -2.085073696  |
| MT2A****              | -2.165154694  |
| HMGA1****             | -2.202244352  |
| MMP1****              | -2.466878261  |

| Fully-Mature (FM) |               |
|-------------------|---------------|
| Gene              | Average LogFC |
| IGFBP3****        | 2.839701836   |
| ESM1****          | 2.603010821   |
| IGF2****          | 2.598543141   |
| INSR****          | 2.394917281   |
| HLA-B****         | 2.255402078   |
| TCF4****          | 2.052826873   |
| CD93****          | 2.036025929   |
| PECAM1****        | 1.99525718    |
| ACKR3****         | 1.990773556   |
| PLVAP****         | 1.970377307   |
| NEAT1****         | 1.965910456   |
| SPRY1****         | 1.962680299   |
| ANGPT2****        | 1.961169986   |
| RGCC****          | 1.929979405   |
| HSPG2****         | 1.871711824   |
| COL4A1****        | 1.851158264   |
| TP53I11****       | 1.834864472   |
| RFLNB****         | 1.820297661   |
| CXCR4****         | 1.812145964   |
| CD34****          | 1.811398119   |
| SPARC****         | 1.763536864   |
| DEPPI****         | 1.746571776   |
| PXDN****          | 1.745320416   |
| UNC5B****         | 1.703681255   |
| FLT1****          | 1.662451028   |
| B2M****           | 1.655103184   |
| COL4A2****        | 1.63152531    |
| ADGRF5****        | 1.620363791   |
| GJA1****          | 1.588797246   |
| SPP1****          | 1.559651451   |
| ANXA2****         | -1.532336179  |
| TUBA1B****        | -1.76975269   |
| MMP1****          | -1.885111478  |
| MT1E****          | -2.016514401  |
| MT2A****          | -2.294959755  |
| HMGA1****         | -2.481583463  |

| Inflamed (Inf) |               |
|----------------|---------------|
| Gene           | Average LogFC |
| COL3A1****     | 3.790343782   |
| IGFBP5****     | 3.767910699   |
| COL1A2****     | 3.456215894   |
| MGP****        | 3.436031728   |
| STATH****      | 3.376360389   |
| COL1A1****     | 3.35150075    |
| TIMP1****      | 3.271068336   |
| STC1****       | 2.761122651   |
| COL6A2****     | 2.651220963   |
| SAA1****       | 2.634649398   |
| SERPINE2****   | 2.597995887   |
| COL6A1****     | 2.573399435   |
| AREG****       | 2.445094854   |
| COL6A3****     | 2.305247798   |
| DCN****        | 2.254222597   |
| FN1****        | 2.220866953   |
| IGF2****       | 2.062980648   |
| TFPI2****      | 1.856624892   |
| PLAC9****      | 1.830906964   |
| LUM****        | 1.806349544   |
| NDUFA4L2****   | 1.791817577   |
| LOX****        | 1.785051044   |
| CXCL2****      | 1.741603755   |
| TGM2****       | 1.731212221   |
| PDGFRB****     | 1.730017382   |
| CXCL1****      | 1.707399258   |
| MEG3****       | 1.706864124   |
| PLAT****       | 1.696673351   |
| SAA2****       | 1.675952576   |
| CXCL8****      | 1.661135865   |
| SPARC****      | 1.655768294   |
| PAPPA****      | 1.637425773   |
| EGR1****       | 1.628629962   |
| FDCSP****      | 1.57565212    |
| FOS****        | 1.574482144   |
| F3****         | 1.529745697   |
| COL5A2****     | 1.502431491   |
| ARHGDIB****    | -1.500379729  |
| STMN1****      | -1.526635755  |
| SMS****        | -1.555392149  |
| TPM1****       | -1.594545485  |
| ECSCR****      | -1.59696695   |
| JPT1****       | -1.607577918  |
| S100A16****    | -1.755430391  |
| TUBA1B****     | -1.910956266  |
| MMP1****       | -2.286670634  |
| HMGA1****      | -2.461526253  |

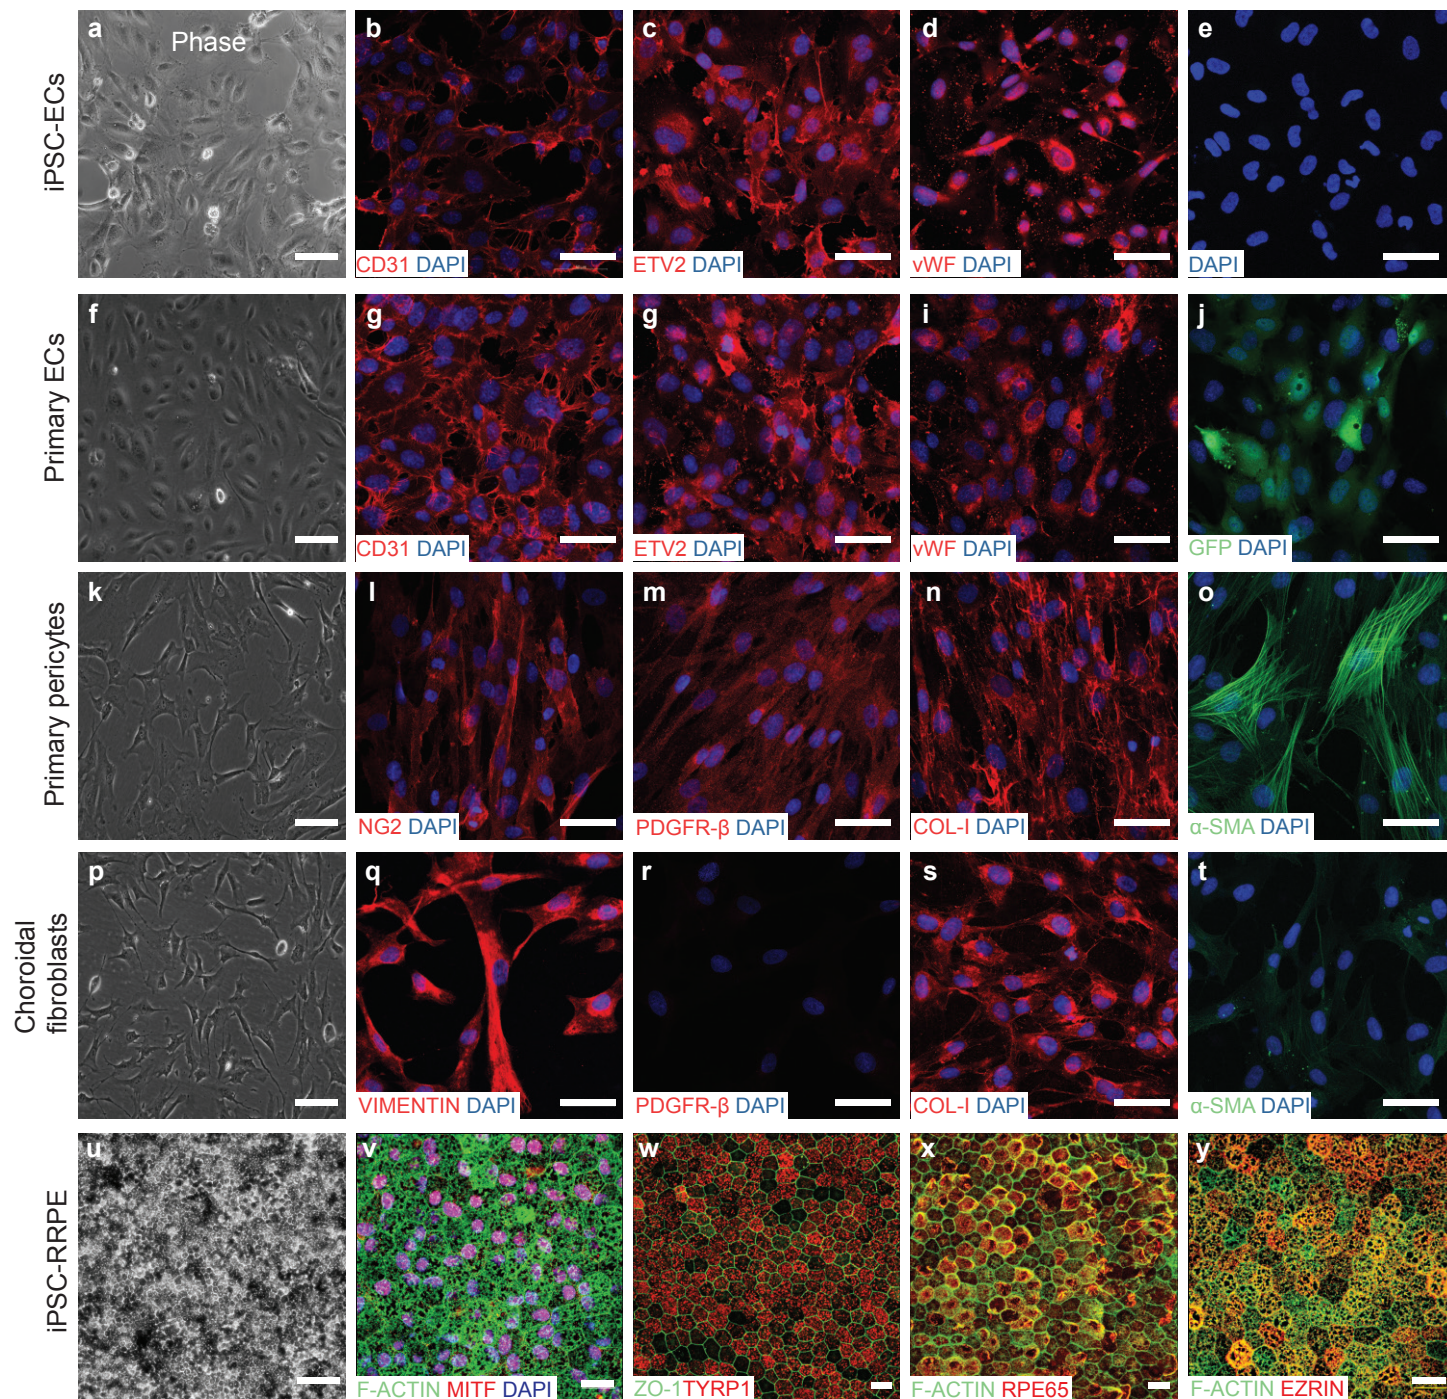

**Supplementary Fig. 1 | Representative images of iPSC-derived endothelial cells (iECs), primary endothelial cells (EC), retinal pericyte, choroid fibroblast, and iRPE. a-j,** Phase contrast images of iECs (**a**) (N=5) and primary ECs (**f**) (N=4). Immunostaining for iEC and GFP+ primary ECs with CD31 (**b,g**)(N=3), ETV2 (**c,h**) (N=3), vWF (**d,i**) (N=3). GFP expression in primary ECs (**j**) (N=4). DAPI (**b-e, g-j**). **k-o,** Phase contrast image of primary pericytes (**k**) (N=5). Immunostaining of primary pericytes with NG2 (**l**), PDGFR- $\beta$  (**m**), COL-1 (**n**), and  $\alpha$ -SMA (**o**) (**l-o** N=3). DAPI (**l-o**). **p-t,** Phase contrast image of choroidal fibroblasts (**p**) (N=5). Immunostaining of choroidal fibroblasts with VIMENTIN (**q**), lacking PDGFR- $\beta$  expression (**r**), and positive expression for COL-1 (**s**) and lacking  $\alpha$ -SMA (**t**) (**q-t** N=3). DAPI (**q-t**). **u-y,** Phase contrast image of iPSC-derived RPE (iRPE) cells (**u**). Immunostaining of iRPE cells with MITF (red) F-ACTIN (green) (**v**), ZO-1 (green) and TYRP1 (red) (**w**), F-ACTIN (green) and RPE65 (red) (**x**), and F-ACTIN green and Ezrin (red) (**y**). DAPI (**v-y**). Scale bars, 50  $\mu$ m.



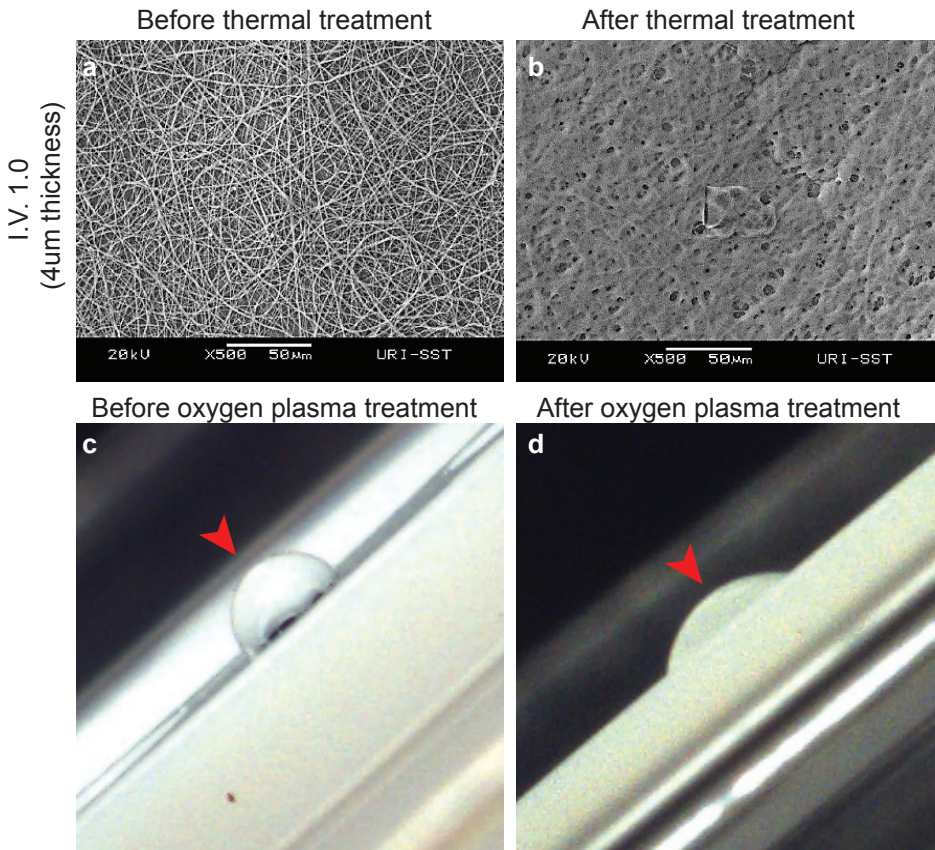

**Supplementary Fig. 2 | Scaffold preparation for bioprinting.** **a,b**, Microstructure of PLGA electrospun scaffolds without or with heat treatment **c,d**, Oxygen-plasma treatment-induced hydrophilicity on Teflon. Red arrowheads mark water droplet before and after the treatment. Scale bars, 50 μm. (n=3)

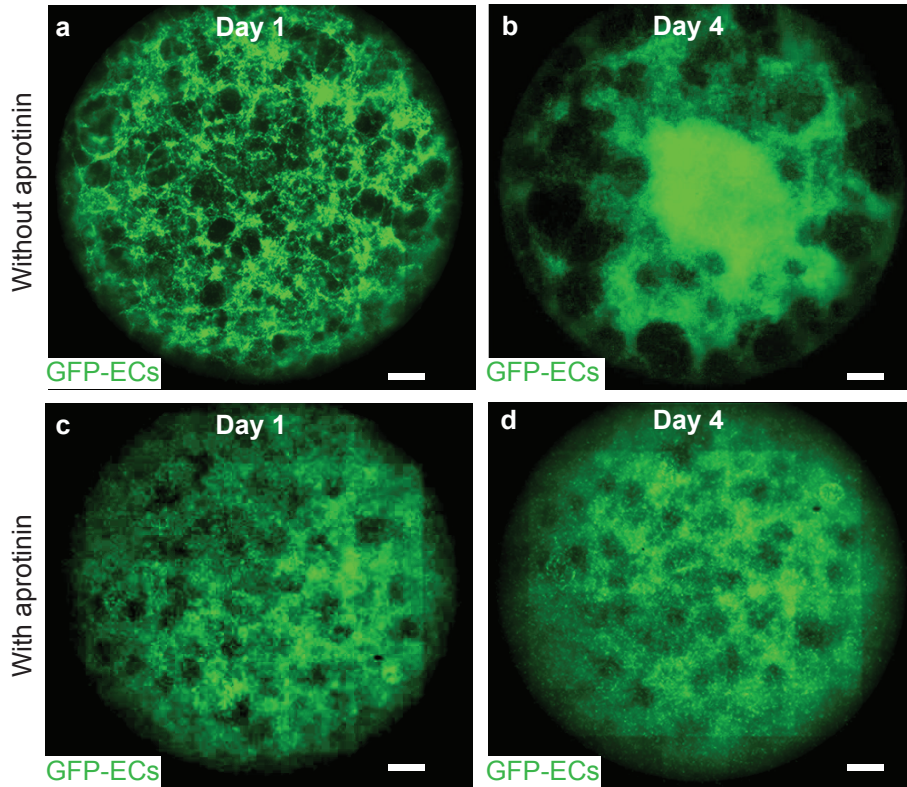

**Supplementary Fig. 3 | Aprotinin stabilizes 3D vasculature.** GFP positive endothelial cells were embedded in fibrin gels consisting of 2.5mg/ml of FIBRINOGEN and 0.5U/ml of THROMBIN. Cultures were incubated with or without aprotinin. Images represent entire well area in a 24 well plate. Images were taken at day 1 (**a,c**) and day 4 (**b,d**). Scale bars, 2 mm. (n=3)

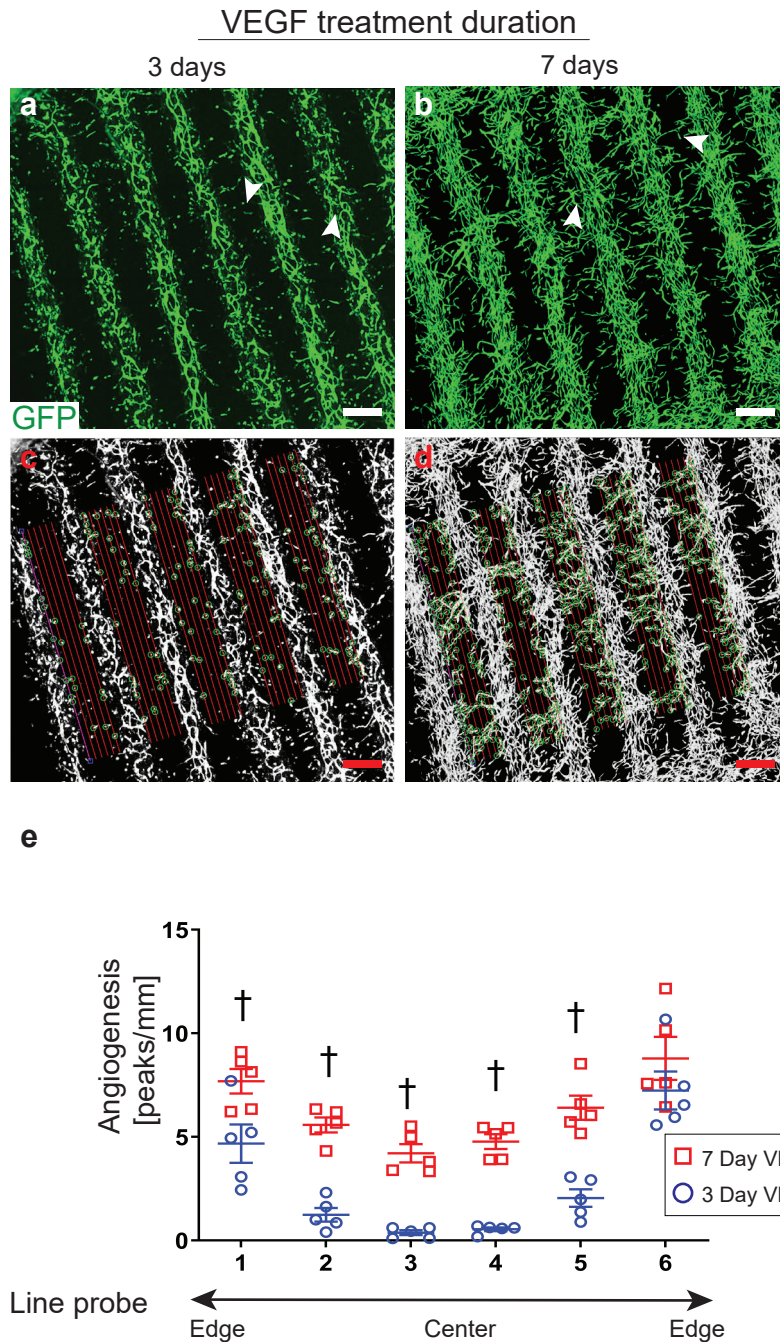

**Supplementary Fig. 4 | VEGF promotes angiogenesis in printed tissue.** **a,b**, GFP positive ECs showing angiogenesis with 3 days (**a**) or 7 days (**b**) of VEGF (85ng/mL) treatment. Arrow heads mark ECs derived capillaries expanding from the printed structure. Scale bars, 500 $\mu$ m. **c-e**, Image quantification of angiogenesis. Fluorescence intensity is measured along six red line probes between printed stripes. Statistical significance was attributed to values of  $p < 0.05$  as determined by two-way ANOVA and Sidak's multiple comparison test. † $p < 0.05$ , (n=5), error bars indicate STE.



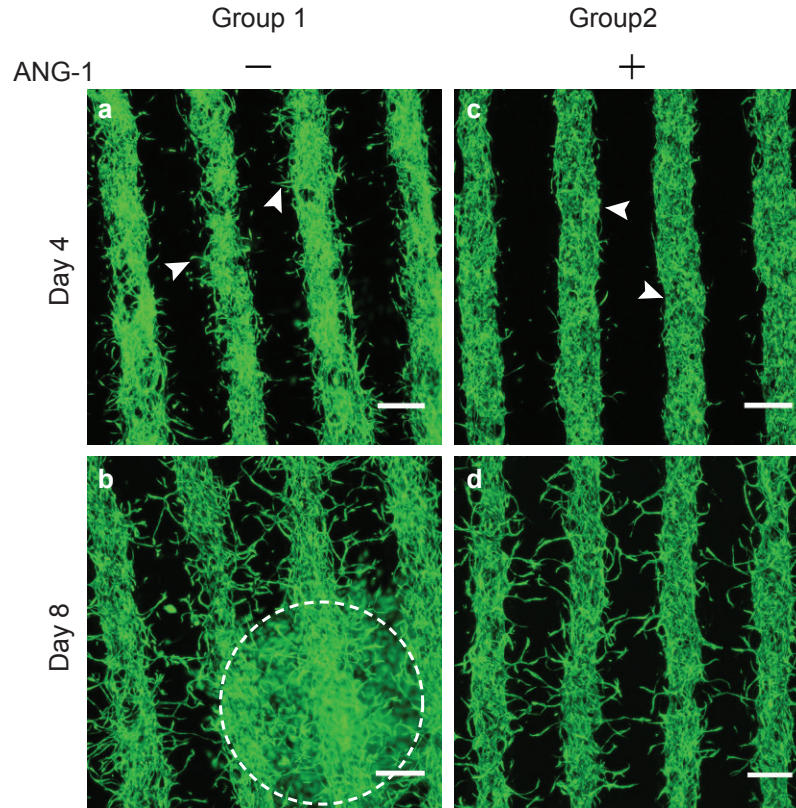

**Supplementary Fig. 5 | Angiopoietin-1 reduces EC migration. a-d,** Vascular development for 8 days with ANG-1 (100 ng/ml) treatment. Arrow heads mark branching out capillaries sprouting from the printed structure. Dotted-circle marks single cell migration. Scale bars, 500 $\mu$ m. n=3.



### Bioprinted GFP-ECs (segmented images for quantification of angiogenesis)

Day 3

Day 5

Day 7

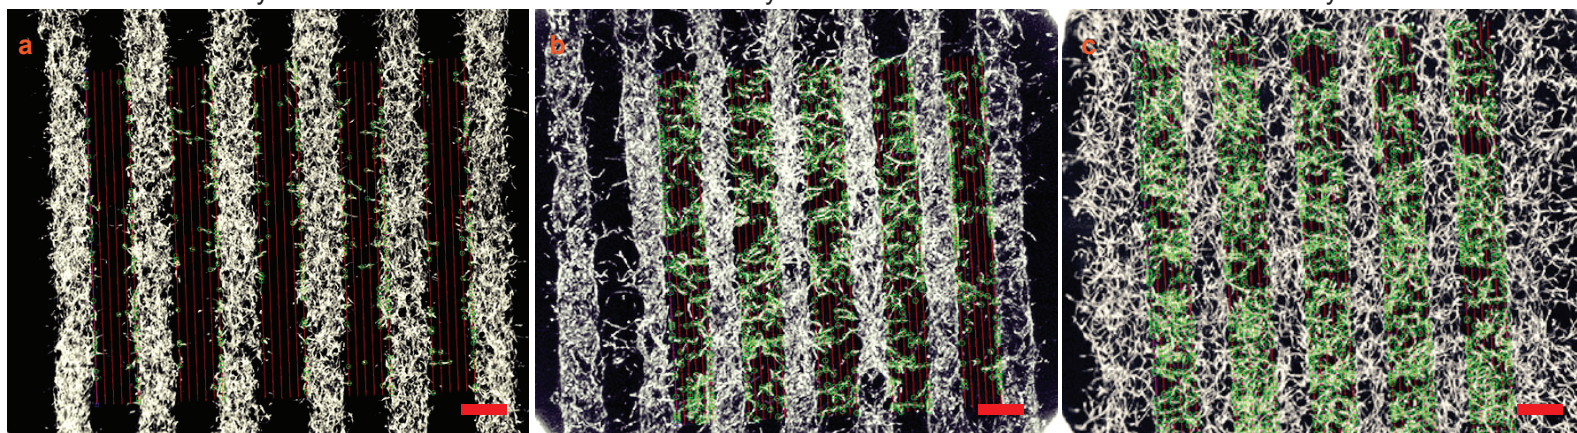

### Bioprinted iECs at day 7 (segmented images for quantification of angiogenesis)

3 Day (+VEGF)

7 Day (+VEGF)

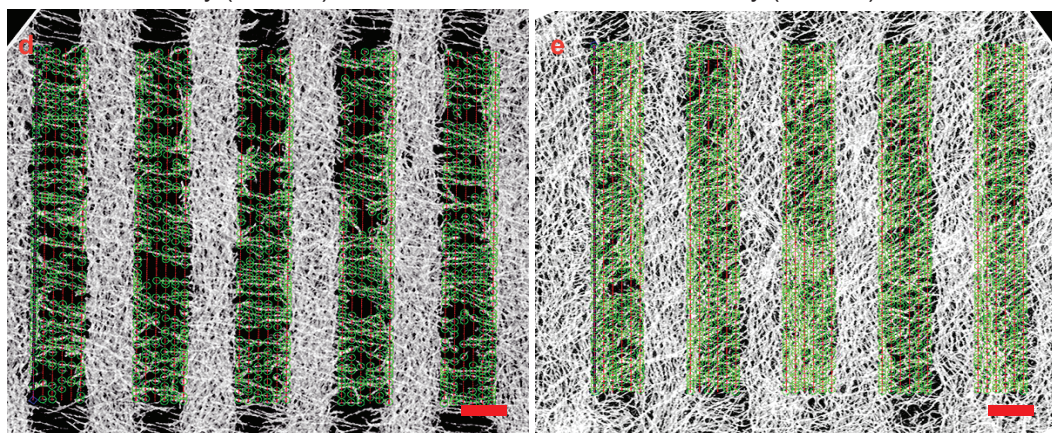

**Supplementary Fig. 6 | Angiogenesis quantification.** a-e, Fluorescence intensity is measured along six red line probes between printed stripes from day 3 to 7 of angiogenesis (a-c) and with 3 or 7 days of VEGF treatment (d, e). a-c, n=5. d,e, n=4. Line probes (red; 100 $\mu$ m apart) were placed in each gap between stripes of the printed geometry. Each line probe detects number of peaks of GFP intensity above a threshold. Line 1 and 6, 2 and 5, 3 and 4 mark edges, intermediate, and center of each gap, respectively. Scale bars, 500 $\mu$ m.

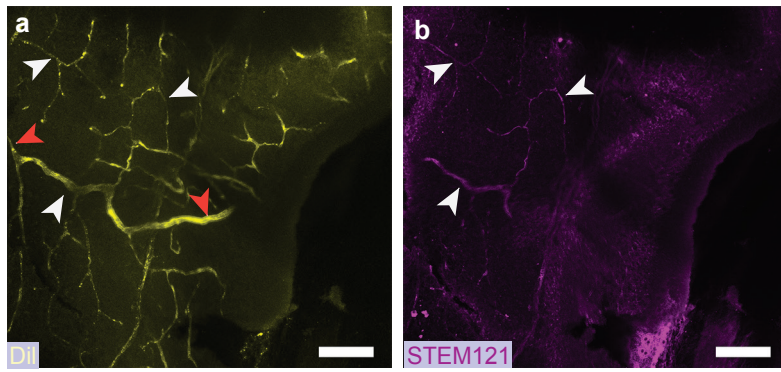

**Supplementary Fig. 7 | a,b,** DiI (yellow) signal marks rat capillaries and immunostaining for STEM121 (magenta) detects human capillaries integrated with rat capillaries.

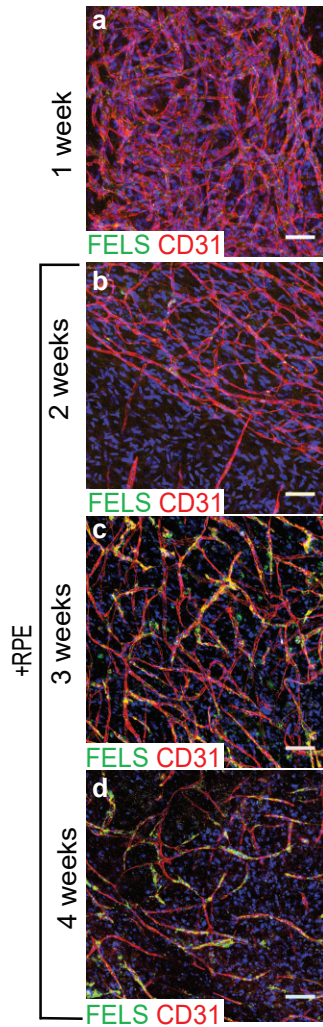

**Supplementary Fig. 8 | Time course of fenestration marker expression in 3D-oBRB. a-d,** 3D vascular growth within tissues fixed at week 1 (a), week 2 (b), week 3 (c), and week 4 (d). Tissues were immunostained with FELS (green) and CD31 (red). Scale bars, 50µm. n=3.



a

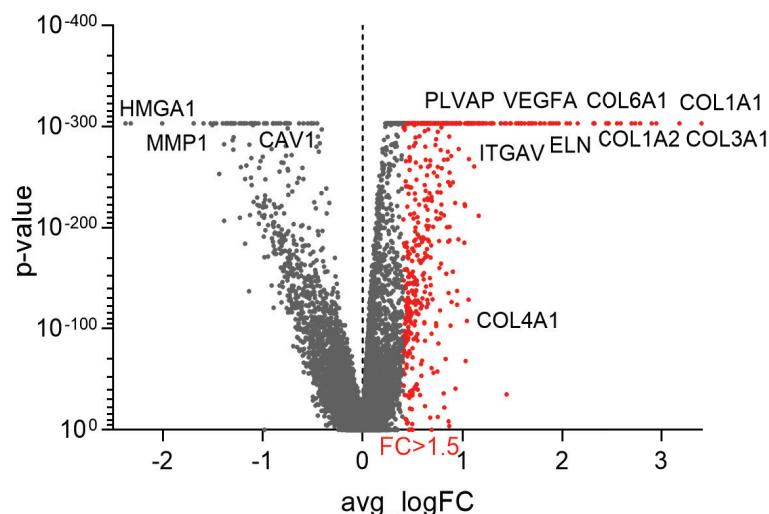

b

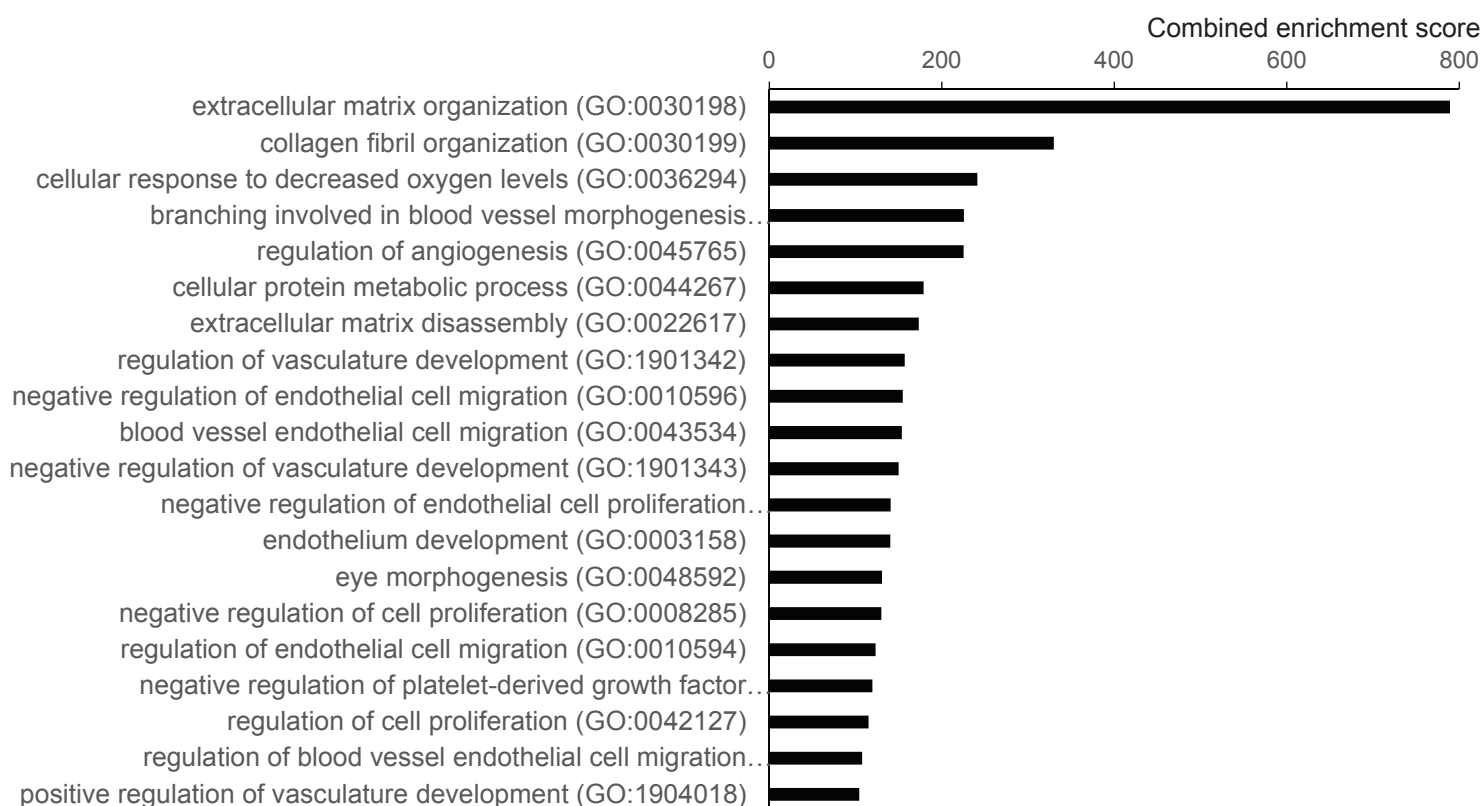

### Supplementary Fig. 9 | Comparative analysis of gene expression between 2D-iECs and iECs from

**3D-oBRB.** **a**, Volcano plot of 21,792 genes. Red dots indicate genes that demonstrated greater than 1.5

log -fold change (531 genes) from 2D monoculture. **b**, Relevant Gene Ontology Biological Process

categories (scores>100) using 531 genes (FC>1.5) by Enrichr20. Data depicts results from n = 5369 cells

(2D iECs), and n = 1294 cells (3D-oBRB iECs).



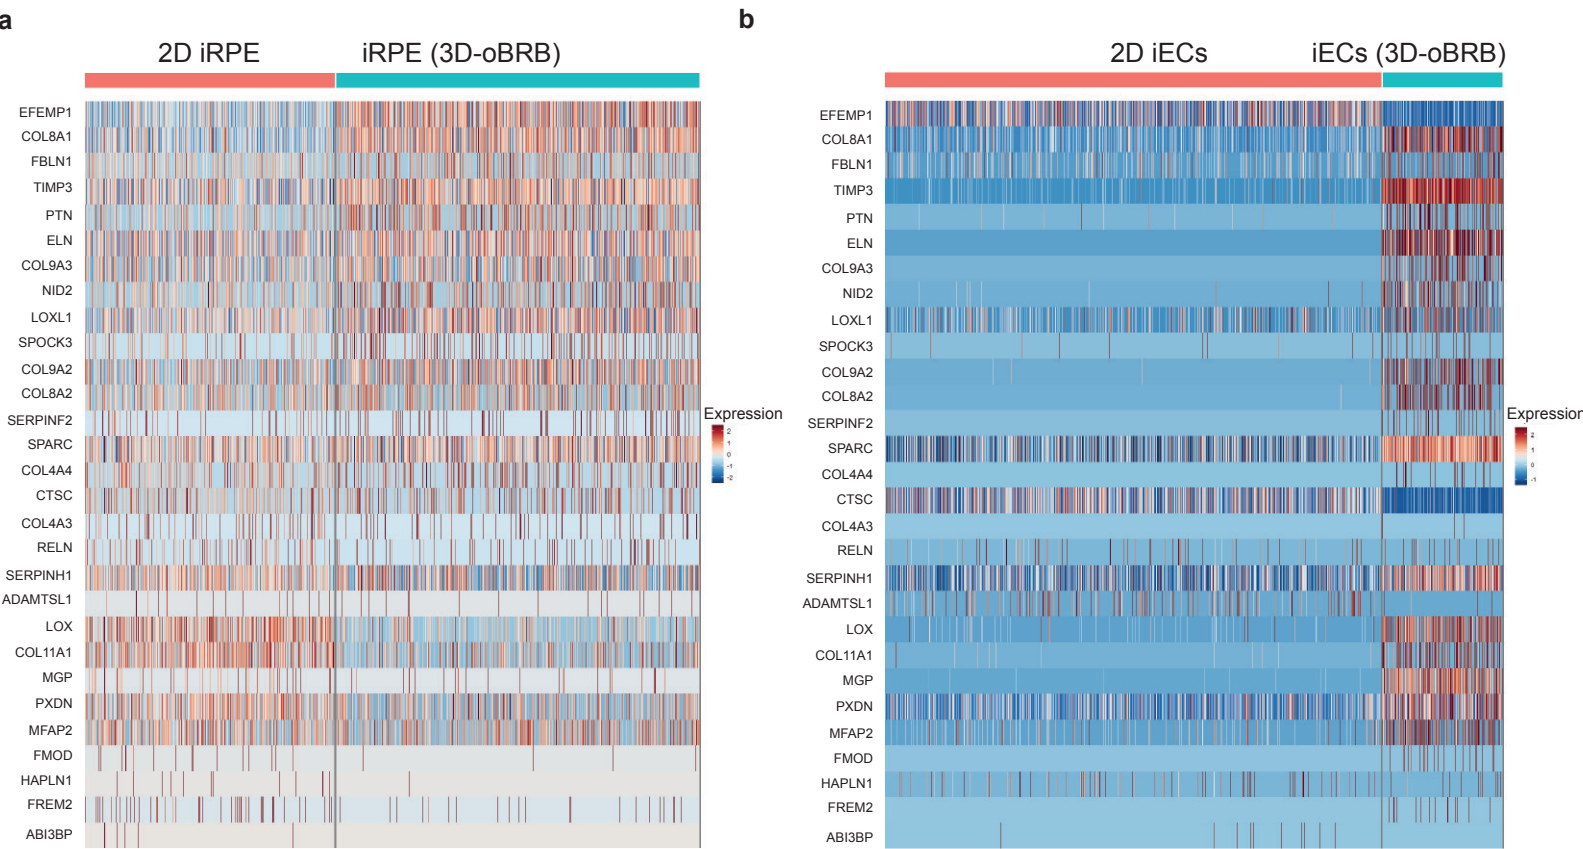

**Supplementary Fig. 10 | ECM related gene expressions in iEC and iRPE in 2D and in 3D-oBRB. a,** ECM gene expression comparisons between 2D iRPE and iRPE in 3D-oBRB. Average log fold change and significance calculations performed between RPE monocultures and oBRB performed using the Seurat gene analysis package. **b,** ECM gene expression comparisons between 2D iECs and iECs from 3D-oBRB. Average log fold change and significance ( $p < 0.05$ ) calculations performed between 2D iECs and 3D-oBRB performed using the Seurat gene analysis package. Data depicts results from  $n = 3012$  cells (2D RPE),  $n = 4380$  cells (3D-oBRB RPE),  $n = 5369$  cells (2D iECs), and  $n = 1294$  cells (3D-oBRB iECs).

a

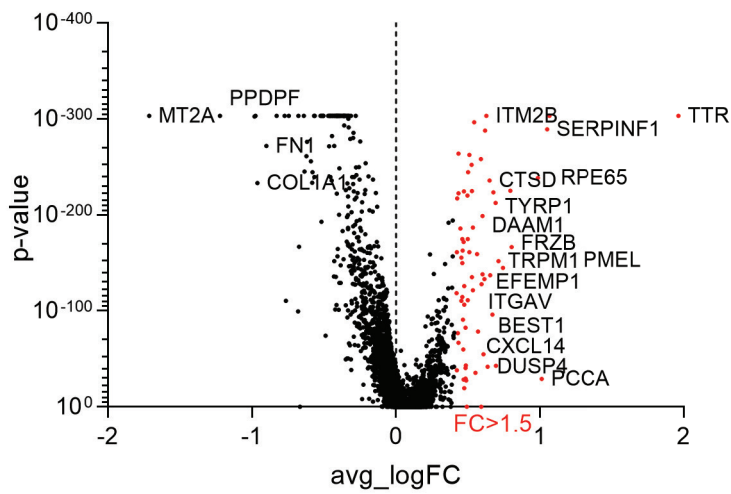

b

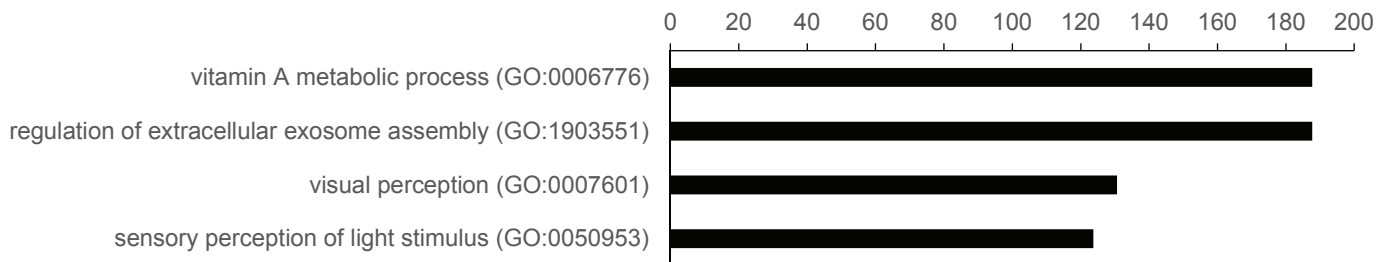

**Supplementary Fig. 11 | Comparative analysis of genes significantly different between 2D iRPE and iRPE cells from 3D-oBRB. a,** Volcano plot of 21,321 genes. Red dots indicate genes greater than 1.5 log-fold changes (69 genes) in iRPE from 3D-oBRB as compared to 2D-iRPE. **b,** Relevant Gene Ontology Biological Process categories (scores > 100) using 69 genes ( $FC > 1.5$ ) by Enrichr20. Data depicts results from  $n = 3012$  cells (2D RPE),  $n = 4380$  cells (3D-oBRB RPE).

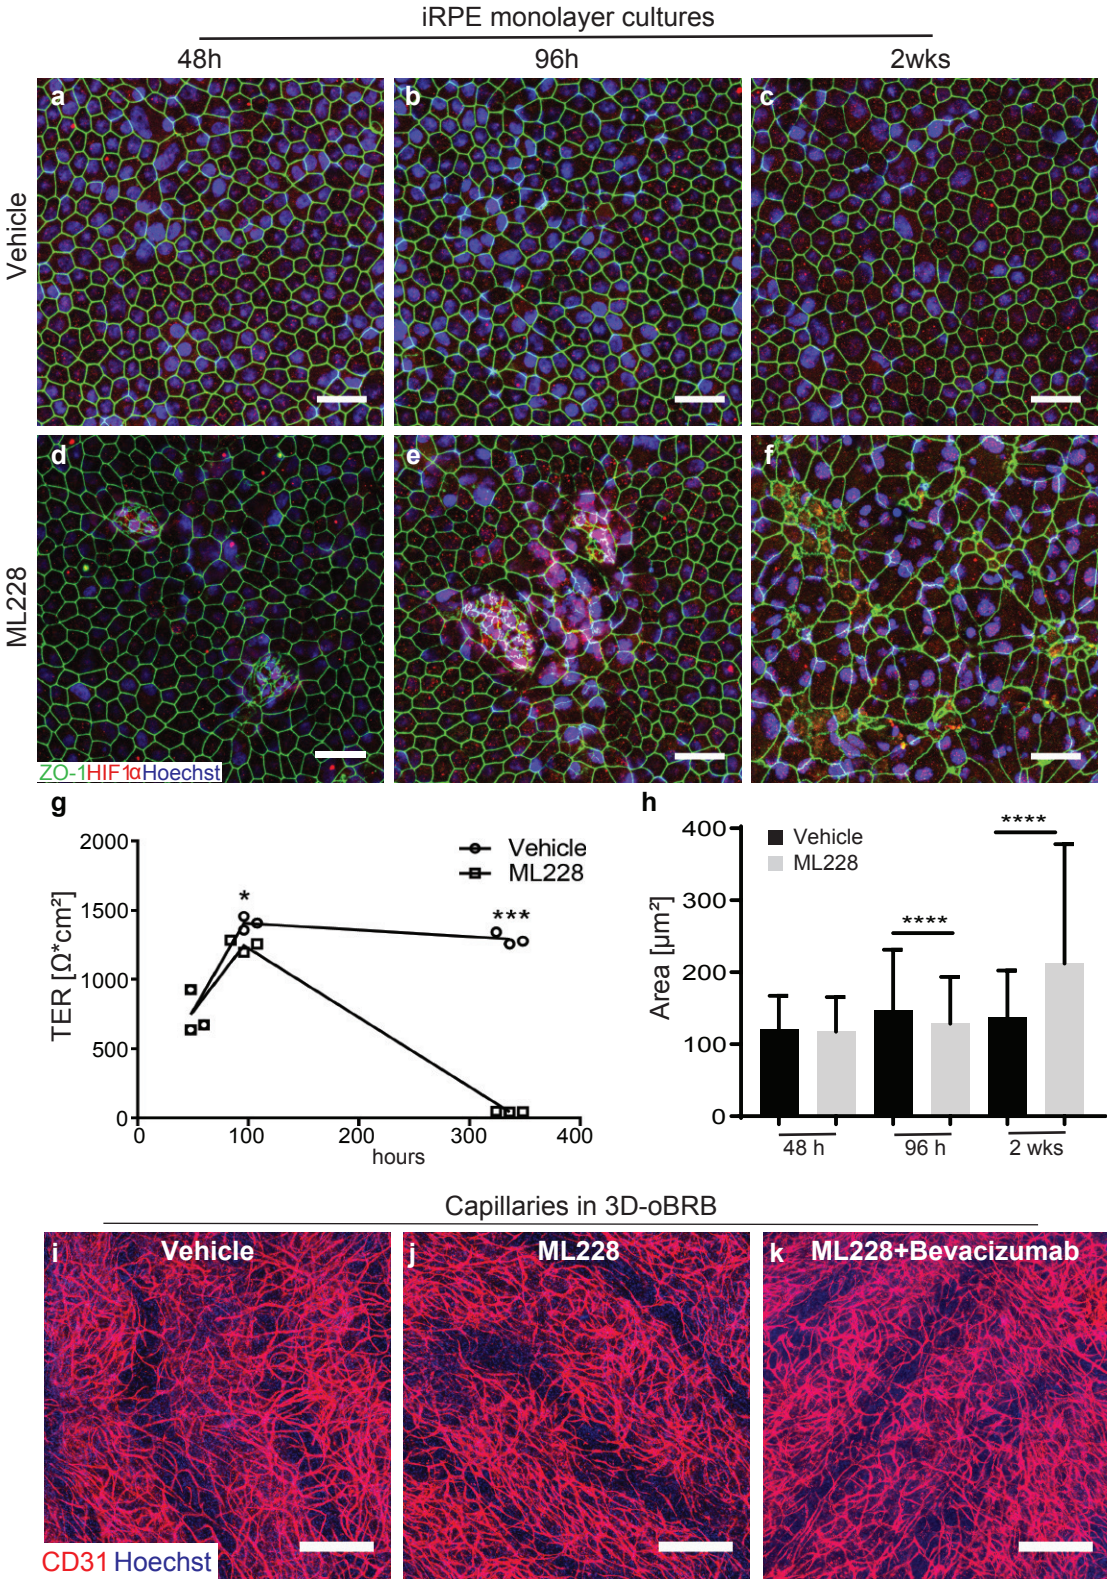

**Supplementary Fig. 12 | ML228 and Bevacizumab treatment on 2D iRPE and 3D-oBRB. a-f,** RPE monoculture at 48 hr (**a,d**), 96 hr (**b,e**), and 2weeks (**c,f**) from the beginning of ML228 (2 $\mu$ M; 96hr) treatment, immunostained with HIF-1 $\alpha$  (red), ZO-1 (green), and Hoeschst (blue). Vehicle treatment consisted of DMSO. Scale bars, 30 $\mu$ m. (n=3) **g**, TER measurement of 2D iRPE without or with ML228 treatment (n=3). **h**, ZO-1 staining based morphometry analysis of individual cell area in vehicle and ML228 treated samples was performed, N=7495. Error bars indicate standard deviation. **i-k**, Images of deep choroidal regions of **i**, vehicle. **j**, ML228. **k**, ML228+bevacizumab treated 3D-oBRB, immunostained with CD31 (red) and Hoechst (blue) show no differences in deeper layers. Scale bars, 350 $\mu$ m. (n=4)



### **Supplementary video legends**

**Supplementary Video 1.** Bioprinting of vascularized tissue with GFP positive ECs and VEGF dependent angiogenesis from day 4 to day 6.

**Supplementary Video 2.** Cross sectional slices of vascularized tissue with iECs at day 7

**Supplementary Video 3.** 3D-oBRB tissue model

**Supplementary Video 4.** ELASTIN and LAMININ formation in 3D-oBRB tissue model

**Supplementary Video 5.** Complement induced dry age-related macular degeneration model

**Supplementary Video 6.** HIF-1 $\alpha$  induced CNV in 3D-oBRB with anti-VEGF (bevacizumab) treatment.
